# Supplementary material
Source: PubMed Central journal article supplement (PMC2683122)
Supplement: 0903188106_ST1_PDF.pdf [file 0903188106_ST1_PDF.pdf]

**Table S1.** Proteins detected by ESI LC/MS and MSMS

| Protein name                                    | Uniprot accession no. | ID category <sup>a</sup> | Protein MW, Da | Sequence Coverage, % <sup>b</sup> | Best peptide mascot "score" <sup>c</sup> | Best peptide               | Peptide mass error, Da |
|-------------------------------------------------|-----------------------|--------------------------|----------------|-----------------------------------|------------------------------------------|----------------------------|------------------------|
| La-related protein 7                            | Q4G0J3                | [ID2+]                   | 67,143         | 34                                | 135                                      | SSSEDAESLAPR               | -0.0                   |
| Bicoid-interacting protein 3 homolog            | Q7L2J0                | [ID2+]                   | 74,937         | 23                                | 84                                       | DAPQPYELNTAINCR            | -0.14                  |
| Polyadenylate-binding protein 1                 | P11940                | [ID2+]                   | 70,508         | 19                                | 57                                       | SKVDEAVAVLQAHQAK           | -0.10                  |
| Heterogenous nuclear ribonucleoprotein K        | P661978               | [ID2+]                   | 47,756         | 13                                | 56                                       | IITITGTQDQIQNAQYLLQNSVK    | -0.18                  |
| Heterogeneous nuclear ribonucleoprotein H       | P31943                | [ID1]                    | 49,352         | 9                                 | 49                                       | EEIVQFFSGLEIVPNGITLPVDFQGR | -0.10                  |
| Lupus La protein                                | P05455                | [ID1]                    | 47,919         | 3                                 | 61                                       | LTTFDFNVIVQALSK            | -0.04                  |
| Heat shock protein HSP 90-beta                  | P08238                | [ID2+]                   | 83,423         | 66                                | 104                                      | GVVDSFDLPLNISR             | -0.04                  |
| Cyclin-T1                                       | O60563                | [ID2+]                   | 81,034         | 30                                | 76                                       | TYSLSSSFSSSSSTR            | -0.04                  |
| Cyclin T2                                       | Q29R66                | [ID2+]                   | 74,149         | 16                                | 94                                       | SPVGLSSDGISSSSSSSR         | -0.03                  |
| Cell division protein kinase 9                  | P50750                | [ID2+]                   | 43,149         | 75                                | 96                                       | NPATTNQTEFER               | -0.09                  |
| Hexamethylene bis-acetamide-inducible protein 1 | O94992                | [ID2+]                   | 40,884         | 33                                | 77                                       | LGAPAAGGEEEWGQQQR          | -0.06                  |
| Hexamethylene bis-acetamide-inducible protein 2 | Q96MH2                | [ID1]                    | 32,741         | 6                                 | 66                                       | QVEELAAEVQR                | -0.05                  |
| Hsp90 co-chaperone Cdc37                        | Q16543                | [ID2+]                   | 44,953         | 32                                | 76                                       | QYMEGFNDELEAFK             | -0.07                  |

<sup>a</sup>Protein identification is based on 1 and 2 or more peptides for [ID1] and [ID2+] categories, respectively.

<sup>b</sup>Unique nonoverlapping peptides were used to calculate protein sequence coverage defined as the ratio between the sum of amino acids encompassed by the confidently matched peptides (%CI >95%) and the number of amino acids in a polypeptide sequence.

<sup>c</sup>Ions score is  $-10 \cdot \log(P)$ , where P is the probability that the observed match is a random event. Ions scores above N, the mascot significance level calculated for  $p < 0.05$ , are considered to be statistically nonrandom.
