# Supplementary material
Source: PubMed Central journal article supplement (PMC2683122)
Supplement: 0903188106_ST3_PDF.pdf [file 0903188106_ST3_PDF.pdf]

**Table S3.** Oligonucleotide sequences for pSVED-A Tot splicing variant analysis

| Primer  | Sequence                 |
|---------|--------------------------|
| F32-34F | GGTTCAGACTGCAGTAACCACTA  |
| EDAR    | GGTCACCCTGTACCTGGAAA     |
| F34R    | TCACGATCCAGGGTCACCCGCACT |
