# Supplementary material
Source: PubMed Central journal article supplement (PMC2683122)
Supplement: 0903188106_ST4_PDF.pdf [file 0903188106_ST4_PDF.pdf]

**Table S4.** MO oligonucleotide sequences

| MO                           | Sequence                  |
|------------------------------|---------------------------|
| Control                      | CCTCTTACCTCAGTTACAATTTATA |
| <i>D. rerio</i> <i>larp7</i> | ATTAATAAAGTTACATACATCCATC |
| <i>D. rerio</i> <i>bcin3</i> | CATGTTTCTGTGGTCTTACCTTAAT |
