# Supplementary material
Source: PubMed Central journal article supplement (PMC2683122)
Supplement: 0903188106_ST5_PDF.pdf [file 0903188106_ST5_PDF.pdf]

**Table S5.** Oligonucleotide sequences for determining MO efficacy

| MO                     | Forward Primer       | Reverse Primer       |
|------------------------|----------------------|----------------------|
| D. rerio <i>larp7</i>  | ATGTCTTCTGTCGGGGACAC | TCGGTTAAACGTTGTCAGGA |
| D. rerio <i>bcdin3</i> | TCGGTAGATCTCCCTGATGG | GTCTGCAGCAGCACATCACT |
