# Supplementary material
Source: PubMed Central journal article supplement (PMC2683122)
Supplement: 0903188106_ST6_PDF.pdf [file 0903188106_ST6_PDF.pdf]

**Table S6.** Oligonucleotide sequences for qPCR analysis of gene transcription

| mRNA/snRNA           | Forward Primer            | Reverse Primer            |
|----------------------|---------------------------|---------------------------|
| H. sapiens LARP7     | AGTGTCGCACCCAGGAGAAAGTTA  | ATTGCTGCCAAAGTATCCCGGACT  |
| H. sapiens BCDIN3    | TGTGTTACCCTCCAACCTCCTCCT  | TGCAAGTATTGAGACTGAGCGGGT  |
| H. sapiens HEXIM1    | AAGAAGAAGCGGCATTGGAAACCG  | TCCATGAGGAACTGCGTGGTGTTA  |
| H. sapiens Brd4      | ATCAAGTCTAAACTGGAGGCCCGT  | AAGCGCATTTCGAACACATCCTGG  |
| H. sapiens GAPDH     | CCCCCTCTGCTGATGCC         | CCCCGCGGCCATCACG          |
| H. sapiens 7SK snRNA | CTTCGGTCAAGGGTATACGAGT    | ATGCAGCGCCTCATTGGATGT     |
| H. sapiens hnRNP A1  | TTTGACGACCATGACTCCGTGGAT  | AGAACCACTTCGACCTCTTTGGCT  |
| H. sapiens SF2/ASF   | TATCCGCGACATCGACCTCAAGAA  | AATCATAGCCGTCGCGACCATAACA |
| D. rerio RPL4        | TCCCATCCGCCCTGATATTGTGAA  | ACATATTTCCGAAAGCACCCCTGGC |
| D. rerio 7SK snRNA   | ATCGCTAGGGTTGATTCCGGCTGAT | GTTGCCTTGAGCTTGTGGAGGT    |
