# Supplementary material
Source: PubMed Central journal article supplement (PMC2683122)
Supplement: 0903188106_ST7_PDF.pdf [file 0903188106_ST7_PDF.pdf]

**Table S7.** Oligonucleotide sequences for qPCR analysis in ChIP experiments

| Gene region                    | Forward Primer           | Reverse Primer           |
|--------------------------------|--------------------------|--------------------------|
| Intergenic genomic region (In) | AGTCCAGGAGTTGGAGGTTACAGT | TGCTATATTGCCCAGGCTGGTCTT |
| pSVED-A Tot (Pr)               | ACAGACTCAGAGAGAACCCACCAT | TCCGCACCATACTCGCCA       |
| pSVED-A Tot (Ex)               | CCCAATGTTCACTCACTGGAT    | CCAGCTTAACGGTATTTGGAGGTC |
